# Supplementary material for: Diagnosis and prognosis prediction of gastric cancer by high-performance serum lipidome fingerprints
Source: PubMed Central journal article supplement (PMC11628598; doi:10.1038/s44321-024-00169-0), 2024-11-14
Supplement: 44321_2024_169_MOESM8_ESM.pdf [file 44321_2024_169_MOESM8_ESM.pdf]

Table EV8. Univariate and multivariate Cox proportional hazards analyses of overall survival in GC patients of three cohorts.

| Characteristics      | Exploration cohort |              |                             |               |              |                             | External validation cohort |              |                             |               |             |                             | Predictive cohort |              |                             |               |              |                             |
|----------------------|--------------------|--------------|-----------------------------|---------------|--------------|-----------------------------|----------------------------|--------------|-----------------------------|---------------|-------------|-----------------------------|-------------------|--------------|-----------------------------|---------------|--------------|-----------------------------|
|                      | Univariable        |              |                             | Multivariable |              |                             | Univariable                |              |                             | Multivariable |             |                             | Univariable       |              |                             | Multivariable |              |                             |
|                      | HR                 | 95% CI       | <i>P</i> value <sup>a</sup> | HR            | 95% CI       | <i>P</i> value <sup>a</sup> | HR                         | 95% CI       | <i>P</i> value <sup>a</sup> | HR            | 95% CI      | <i>P</i> value <sup>a</sup> | HR                | 95% CI       | <i>P</i> value <sup>a</sup> | HR            | 95% CI       | <i>P</i> value <sup>a</sup> |
| Sex                  | 0.696              | 0.406~1.191  | 0.186                       | 0.957         | 0.469~1.952  | 0.904                       | 0.680                      | 0.332~1.395  | 0.293                       | 0.892         | 0.345~2.310 | 0.814                       | 0.617             | 0.234~1.622  | 0.327                       | 0.346         | 0.057~2.105  | 0.249                       |
| Age                  | 1.498              | 0.677~3.315  | 0.318                       | 1.305         | 0.537~3.173  | 0.557                       | 0.813                      | 0.284~2.330  | 0.700                       | 1.011         | 0.245~4.174 | 0.988                       | NA                |              |                             | NA            |              |                             |
| Differentiation      | 2.648              | 1.044~6.719  | 0.040                       | 4.777         | 0.796~28.676 | 0.087                       | 0.940                      | 0.534~1.658  | 0.832                       | 0.654         | 0.311~1.374 | 0.262                       | 2.324             | 0.656~8.229  | 0.191                       | 0.752         | 0.137~4.138  | 0.744                       |
| Maximun diameter     | 2.838              | 1.623~4.966  | <0.001                      | 1.781         | 0.915~3.464  | 0.089                       | 1.652                      | 0.772~3.532  | 0.196                       | 0.859         | 0.344~2.145 | 0.745                       | 4.700             | 1.804~12.245 | 0.002                       | 0.683         | 0.171~2.724  | 0.589                       |
| pTNM                 | 10.088             | 4.312~23.599 | <0.001                      | 2.716         | 0.963~7.658  | 0.059                       | 5.289                      | 2.021~13.845 | 0.001                       | 2.723         | 0.845~8.782 | 0.094                       | 5.341             | 1.530~18.647 | 0.009                       | 6.967         | 1.402~34.627 | 0.018                       |
| Vascular invasion    | 4.293              | 2.330~7.911  | <0.001                      | 1.703         | 0.851~3.407  | 0.133                       | 2.230                      | 1.075~4.627  | 0.031                       | 1.280         | 0.509~3.221 | 0.600                       | 3.083             | 1.086~8.759  | 0.035                       | 1.293         | 0.321~5.214  | 0.718                       |
| Nerve infiltration   | 6.458              | 2.760~15.110 | <0.001                      | 2.922         | 0.956~8.926  | 0.060                       | 1.402                      | 0.676~2.905  | 0.364                       | 0.933         | 0.394~2.209 | 0.874                       | 2.479             | 0.807~7.613  | 0.113                       | 0.812         | 0.176~3.738  | 0.789                       |
| HER2                 | 1.518              | 0.602~3.827  | 0.376                       | 1.328         | 0.392~4.495  | 0.648                       | 1.576                      | 0.596~4.162  | 0.359                       | 0.707         | 0.218~2.295 | 0.564                       | 1.117             | 0.320~3.892  | 0.862                       | 1.006         | 0.173~5.865  | 0.995                       |
| Smoking history      | 0.686              | 0.345~1.364  | 0.282                       | 0.769         | 0.278~2.129  | 0.613                       | NA                         |              |                             | NA            |             |                             | 0.655             | 0.213~2.011  | 0.460                       | 2.088         | 0.166~26.199 | 0.568                       |
| Drinking history     | 0.805              | 0.380~1.706  | 0.572                       | 1.072         | 0.419~2.737  | 0.885                       | NA                         |              |                             | NA            |             |                             | 0.721             | 0.207~2.514  | 0.608                       | 1.550         | 0.117~20.595 | 0.740                       |
| Family tumor history | 0.677              | 0.289~1.582  | 0.367                       | 0.548         | 0.189~1.590  | 0.268                       | NA                         |              |                             | NA            |             |                             | 1.595             | 0.458~5.557  | 0.463                       | 1.563         | 0.319~7.668  | 0.582                       |
| BMI                  | 0.754              | 0.441~1.290  | 0.303                       | 0.884         | 0.465~1.679  | 0.705                       | 0.591                      | 0.241~1.446  | 0.249                       | 1.004         | 0.336~3.004 | 0.994                       | 0.276             | 0.102~0.748  | 0.011                       | 0.491         | 0.119~2.022  | 0.325                       |
| CEA                  | 1.012              | 0.403~2.541  | 0.980                       | 0.952         | 0.329~2.755  | 0.928                       | 0.928                      | 0.324~2.660  | 0.889                       | 0.539         | 0.114~2.559 | 0.437                       | 3.613             | 1.374~9.506  | 0.009                       | 6.285         | 1.283~30.797 | 0.023                       |
| CA19-9               | 3.260              | 1.716~6.197  | <0.001                      | 1.505         | 0.675~3.353  | 0.318                       | 3.432                      | 1.564~7.535  | 0.002                       | 2.923         | 1.051~8.126 | 0.040                       | 3.333             | 1.170~9.498  | 0.024                       | 3.261         | 0.576~18.463 | 0.181                       |
| CA72-4               | 2.401              | 1.323~4.357  | 0.004                       | 1.790         | 0.863~3.714  | 0.118                       | 0.579                      | 0.176~1.909  | 0.369                       | 0.800         | 0.215~2.977 | 0.740                       | 2.197             | 0.770~6.272  | 0.141                       | 0.670         | 0.115~3.915  | 0.657                       |
| Subtype              | 3.344              | 1.912~5.848  | <0.001                      | 2.224         | 1.141~4.336  | 0.019                       | 3.970                      | 1.852~8.510  | <0.001                      | 3.566         | 1.355~9.388 | 0.010                       | 6.460             | 2.267~18.411 | <0.001                      | 6.386         | 1.676~24.336 | 0.007                       |

**Legend:** BMI, body mass index; CA19-9, carbohydrate antigen 199; CA72-4, carbohydrate antigen 724; CEA, carcinoembryonic antigen; CI, confidence interval; GC, gastric cancer; HER2, human epidermal growth factor receptor 2; HR, hazard ratio; pTNM, pathological, tumor, node, metastasis.

<sup>a</sup>Wald Test was used to calculate *P* value.
