# Supplementary material for: Diagnosis and prognosis prediction of gastric cancer by high-performance serum lipidome fingerprints
Source: PubMed Central journal article supplement (PMC11628598; doi:10.1038/s44321-024-00169-0), 2024-11-14
Supplement: 44321_2024_169_MOESM9_ESM.pdf [file 44321_2024_169_MOESM9_ESM.pdf]

Table EV9. Differential expression of the SLMS metabolites in tissues and serums.

| metabolites                      | A           |                      | B           |                      | C           |                      | D           |                      |             |                      |             |                      |
|----------------------------------|-------------|----------------------|-------------|----------------------|-------------|----------------------|-------------|----------------------|-------------|----------------------|-------------|----------------------|
|                                  |             |                      |             |                      |             |                      | GC vs HD    |                      | PL vs HD    |                      | GC vs PL    |                      |
|                                  | t statistic | P value <sup>a</sup> | t statistic | P value <sup>b</sup> | t statistic | P value <sup>b</sup> | t statistic | P value <sup>b</sup> | t statistic | P value <sup>b</sup> | t statistic | P value <sup>b</sup> |
| LPC 17:0                         | -1.18       | 0.268                | 22.566      | <0.001               | -8.134      | <0.001               | -9.352      | <0.001               | -7.249      | <0.001               | -2.051      | 0.042                |
| PE O-44:6 PE O-24:2_20:4         | 2.642       | 0.027                | -9.780      | <0.001               | 8.548       | <0.001               | 7.338       | <0.001               | 3.412       | 0.001                | 4.517       | <0.001               |
| CAR 14:0                         | -2.915      | 0.017                | 4.965       | <0.001               | -0.579      | 0.563                | -3.577      | <0.001               | -3.182      | 0.002                | -0.314      | 0.754                |
| HexCer 42:2;2O HexCer 18:1;2O/24 | -1.401      | 0.195                | -10.396     | <0.001               | 4.373       | <0.001               | 3.959       | <0.001               | 1.612       | 0.109                | 1.952       | 0.053                |
| FA 28:3;O                        | NA          |                      | 9.994       | <0.001               | -10.630     | <0.001               | -8.917      | <0.001               | -6.317      | <0.001               | -2.170      | 0.032                |
| HexCer 42:2;3O                   | -3.810      | 0.004                | 10.487      | <0.001               | -1.405      | 0.162                | -2.908      | 0.004                | -0.864      | 0.389                | -1.809      | 0.073                |
| LPE O-14:1                       | NA          |                      | -9.420      | <0.001               | -8.010      | <0.001               | 4.468       | <0.001               | -4.113      | <0.001               | 7.087       | <0.001               |
| PE 36:4 PE 18:2_18:2             | -3.063      | 0.014                | 9.724       | <0.001               | 3.361       | 0.001                | -0.246      | 0.806                | -0.198      | 0.843                | -0.008      | 0.994                |
| CAR 18:1                         | -3.452      | 0.007                | -8.770      | <0.001               | 5.827       | <0.001               | 4.051       | <0.001               | 4.609       | <0.001               | -0.861      | 0.390                |
| Cer 38:1;2O Cer 18:1;2O/20:0     | -5.729      | <0.001               | -4.257      | <0.001               | 6.571       | <0.001               | 3.338       | 0.001                | 2.126       | 0.035                | 1.493       | 0.138                |
| TG(P) 50:2                       | -0.735      | 0.481                | 4.701       | <0.001               | -2.687      | 0.008                | -2.096      | 0.038                | -1.992      | 0.048                | -0.223      | 0.824                |
| FA 18:0;O                        | -0.739      | 0.479                | 8.102       | <0.001               | -7.400      | <0.001               | -3.839      | <0.001               | -5.489      | <0.001               | 1.103       | 0.272                |
| PC O-38:3                        | -0.132      | 0.898                | 9.495       | <0.001               | -2.951      | 0.004                | -3.772      | <0.001               | -1.906      | 0.059                | -1.809      | 0.073                |
| FA 16:2                          | -2.377      | 0.041                | 7.880       | <0.001               | 6.099       | <0.001               | -2.358      | 0.020                | 5.899       | <0.001               | -11.168     | <0.001               |
| PC O-42:6 PC O-22:2_20:4         | 2.047       | 0.071                | -6.293      | <0.001               | 0.191       | 0.849                | 3.318       | 0.001                | -1.648      | 0.102                | 4.509       | <0.001               |
| Hex2Cer 42:2;2O Hex2Cer 18:1;2O/ | 1.839       | 0.099                | -5.243      | <0.001               | 2.232       | 0.027                | 3.141       | 0.002                | 2.017       | 0.046                | 1.017       | 0.311                |
| PE 40:7 PE 18:1_22:6             | -2.762      | 0.022                | 8.069       | <0.001               | 2.621       | 0.009                | 0.279       | 0.781                | 1.483       | 0.140                | -1.194      | 0.234                |
| LPE 20:4                         | -2.104      | 0.065                | -4.161      | <0.001               | 5.893       | <0.001               | 2.414       | 0.017                | 2.150       | 0.033                | 0.287       | 0.774                |
| PE 40:3                          | NA          |                      | 6.990       | <0.001               | -2.846      | 0.005                | -1.139      | 0.257                | -0.651      | 0.516                | -0.491      | 0.624                |

Legend: A, Differential expression of metabolites in the SLMS between tumor and normal tissues from 10 GC patients. B, Differential expression of 19 lipid metabolites in serums of GC patients and healthy donors from the exploration cohort. C, Differential expression of 19 lipid metabolites in serums of GC patients and healthy donors from the external validation cohort. D, Differential expression of 19 lipid metabolites in serums between any two groups in the predictive cohort.

Abbreviations: SLMS, serum lipid metabolic signature; GC, gastric cancer; HD, healthy donor; PL, precancerous lesion;

<sup>a</sup>Paired t-test was used for comparing two groups.

<sup>b</sup>Student's t test was used for comparing two groups.
